# Supplementary material for: Physical theatre as an approach to contemporary stagings of classical Greek tragedy
Source: MDPI journal article supplement (doi:10.3390/v14020289), 2009-01-01
Supplement: s1 [file s1]

**Supplementary Table S1:** Summary of reference sequences of PCV2 gotten from NCBI and analyzed in this study.

| Sr No | Gene Bank<br>Accession Number | Year | Genotype | Country of Origin |
|-------|-------------------------------|------|----------|-------------------|
| 1     | AF055392                      | 1998 | PCV2a    | Canada            |
| 2     | HM038034                      | 2008 | PCV2a    | China             |
| 3     | KF850458                      | 2009 | PCV2a    | China             |
| 4     | KF850446                      | 2011 | PCV2a    | China             |
| 5     | AF055394                      | 1998 | PCV2b    | France            |
| 6     | AY291318                      | 2002 | PCV2b    | China             |
| 7     | FJ644919                      | 2002 | PCV2b    | China             |
| 8     | EF190924                      | 2004 | PCV2b    | China             |
| 9     | EF197987                      | 2005 | PCV2b    | China             |
| 10    | EF190924                      | 2005 | PCV2b    | China             |
| 11    | HM038027                      | 2006 | PCV2b    | China             |
| 12    | GQ358998                      | 2007 | PCV2b    | China             |
| 13    | HM641752                      | 2007 | PCV2b    | China             |
| 14    | GU450330                      | 2008 | PCV2b    | China             |
| 15    | FJ598044                      | 2008 | PCV2b    | China             |
| 16    | KF850461                      | 2010 | PCV2b    | China             |
| 17    | KF850463                      | 2011 | PCV2b    | China             |
| 18    | KR058355                      | 2014 | PCV2b    | China             |
| 19    | MH920588                      | 2017 | PCV2b    | China             |
| 20    | EU148503                      | 2007 | PCV2c    | Denmark           |
| 21    | AY686763                      | 2004 | PCV2d    | China             |
| 22    | JX948771                      | 2011 | PCV2d    | China             |
| 23    | GQ359010                      | 2008 | PCV2d    | China             |
| 24    | KF850459                      | 2010 | PCV2d    | China             |
| 25    | KR058352                      | 2014 | PCV2d    | China             |
| 26    | HM038031                      | 2017 | PCV2d    | China             |
| 27    | MT184986                      | 2018 | PCV2d    | China             |
| 28    | MT184989                      | 2018 | PCV2d    | China             |
